# Supplementary material
Source: publisher figshare collection journal article supplement (https://springernature.figshare.com/ndownloader/files/15481085)
Supplement: Supplementary file 1 [file 15481085]

## Sheet: Table S1
Table S1 δ13C and δ18Ο values of the modern Terebratalia coreanica (OTTCo) and Laqueus rubellus (SGLR) shells
sample No.	interval	Distance from the posterior shell edge (mm)	δ13C (‰VPDB)	δ18O (‰VPDB)		sample No.	interval	Distance from the posterior shell edge (mm)	δ13C (‰VPDB)	δ18O (‰VPDB)
OTTCo-1	1	0.543796	0.387325	0.605576		SGLR-1	1	0.53204	0.882834	0.360553
OTTCo-2	1	1.36236	0.507417	1.11496		SGLR-2	1	1.34949	0.755677	0.360278
OTTCo-3	1	2.34307	0.402462	1.7445		SGLR-3	1	2.16821	0.971642	0.596116
OTTCo-4	1	3.14181	0.449894	0.494781		SGLR-4	1	2.99789	0.67696	0.718836
OTTCo-5	1	3.9755	0.495307	1.67469		SGLR-5	1	3.84317	0.519528	0.512105
OTTCo-6	1	4.9854	0.392371	1.18012		SGLR-6	1	4.64798	0.595216	0.515179
OTTCo-7	1	5.94734	0.213745	0.857966		SGLR-7	1	5.46712	0.752649	0.39439
OTTCo-8	1	6.79197	0.15824	0.911307		SGLR-8	1	6.47175	1.06449	0.26015
OTTCo-9	1	7.70594	-0.153598	1.42794		SGLR-9	1	7.2753	1.12504	0.335542
OTTCo-10	1	8.59228	0.121909	1.53076		SGLR-10	1	8.03794	1.12605	0.741088
OTTCo-11	1	9.49479	1.00091	1.12153		SGLR-11	1	8.99621	1.2421	0.627271
OTTCo-12	1	10.5068	1.37935	0.492426		SGLR-12	1	9.80396	1.25926	0.688122
OTTCo-13	1	11.4583	1.06045	1.54777		SGLR-13	1	10.7922	1.46917	0.734923
OTTCo-14	1	12.3608	0.562923	1.33269		SGLR-14	1	11.8208	1.451	0.940506
OTTCo-15	1	13.426	0.171359	-0.0622501		SGLR-15	1	12.782	1.57009	0.853798
OTTCo-16	1	14.452	1.121	-0.117062		SGLR-16	1	13.7302	1.56302	0.925685
OTTCo-17	1	15.6361	1.2199	1.75441		SGLR-17	2	14.7007	1.7033	0.817351
OTTCo-18	2	16.8415	1.27541	1.39043		SGLR-18	2	15.5266	1.69321	0.924721
OTTCo-19	2	17.8285	1.35917	1.42938		SGLR-19	2	16.3917	1.49339	0.553728
OTTCo-20	2	18.7685	1.0988	1.42702		SGLR-20	2	17.3073	1.58422	0.596806
OTTCo-21	2	20.3582	1.01201	1.17332		SGLR-21	2	18.2542	1.67605	0.645704
OTTCo-22	3	22.3092	1.02917	1.47056		SGLR-22	2	19.2289	1.93642	0.929073
OTTCo-23	3	24.1251	1.05339	1.51359		SGLR-23	3	20.8153	1.95963	0.809483
OTTCo-24	3	25.8738	1.11192	1.74724		SGLR-24	3	22.8702	1.65385	0.729801
OTTCo-25	3	27.7231	1.17247	1.71122		SGLR-25	3	24.8752	1.31174	0.425231
OTTCo-26	3	29.7252	0.646685	1.25715		SGLR-26	3	26.7424	1.28146	0.262729
OTTCo-27	3	31.6413	1.01907	0.931169		SGLR-27	3	28.8453	1.58825	0.405767
OTTCo-28	3	33.7503	1.13412	1.04234
OTTCo-29	3	35.7904	1.05339	1.74269
OTTCo-30	3	37.8352	1.08164	1.06839
